# Supplementary material
Source: MDPI journal article supplement (https://www.mdpi.com/2624-5175/3/3/30)

# Supplementary file 1

Survival curves of *Drosophila melanogaster* cohorts treated with chronobiotics KL001 and KS15 with two controls

***Note: the figures show in each case the curves for negative and positive controls and only one cohort of treated flies for convenience and comprehensibility of a reader, all the figures are drawn according to raw data files from Supplementary 2.***

**Chronobiotics KL001 and KS15 extend lifespan and modify circadian rhythms of *Drosophila melanogaster***

**I. A. Solovev<sup>1,2</sup>, M. V. Shaposhnikov<sup>1</sup>, A. Moskalev<sup>1</sup>**

<sup>1</sup>*Laboratory of Geroprotective and Radioprotective Technologies, Institute of Biology, Komi Science Centre, Ural Branch, Russian Academy of Sciences, Kommunisticheskaya St. 28, Syktyvkar, 167982, Russian Federation;*

<sup>2</sup>*Medical Institute of Pitirim Sorokin Syktyvkar State University, Oktyabrsky prosp. 55, Syktyvkar, 167001, Russian Federation*

*Corresponding author: A.A. Moskalev ([amoskalev@ib.komisc.ru](mailto:amoskalev@ib.komisc.ru))*

**Supplementary figure S1 KL001-treated males' survival**

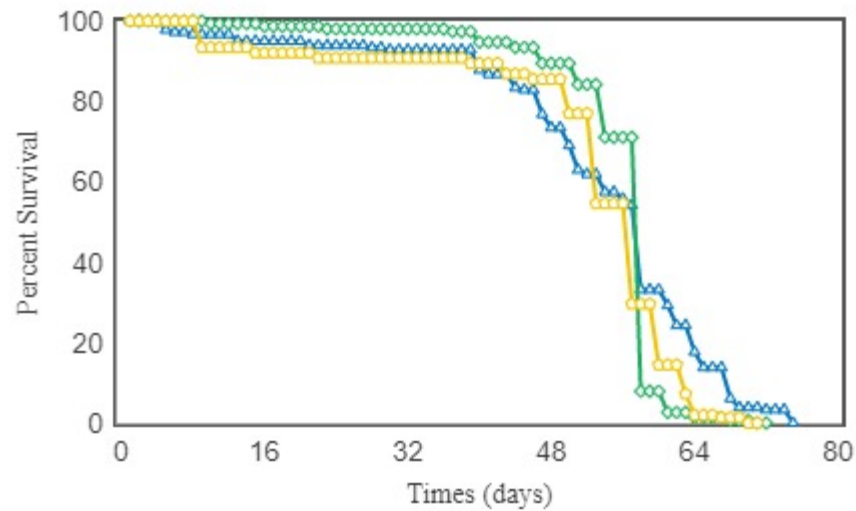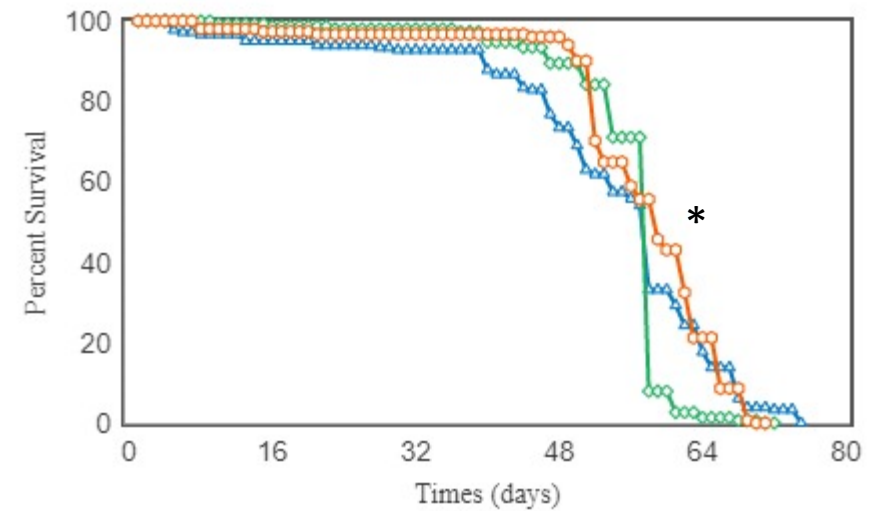

**a**

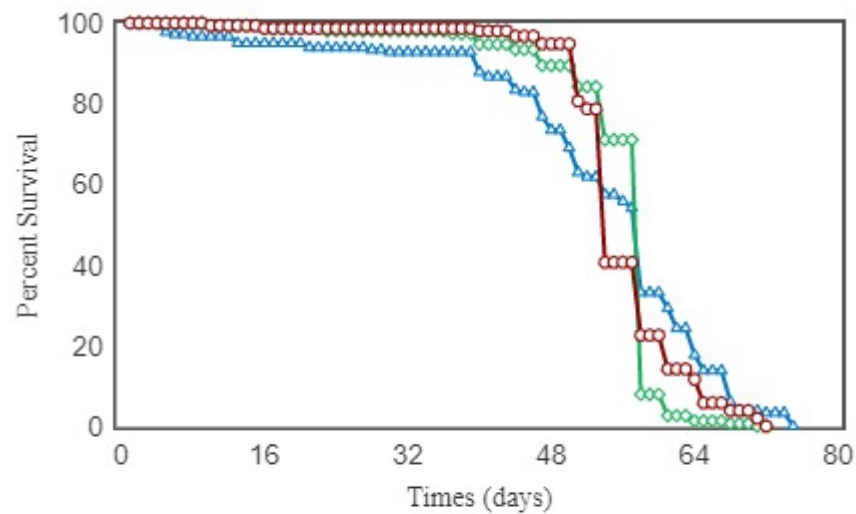

**b**

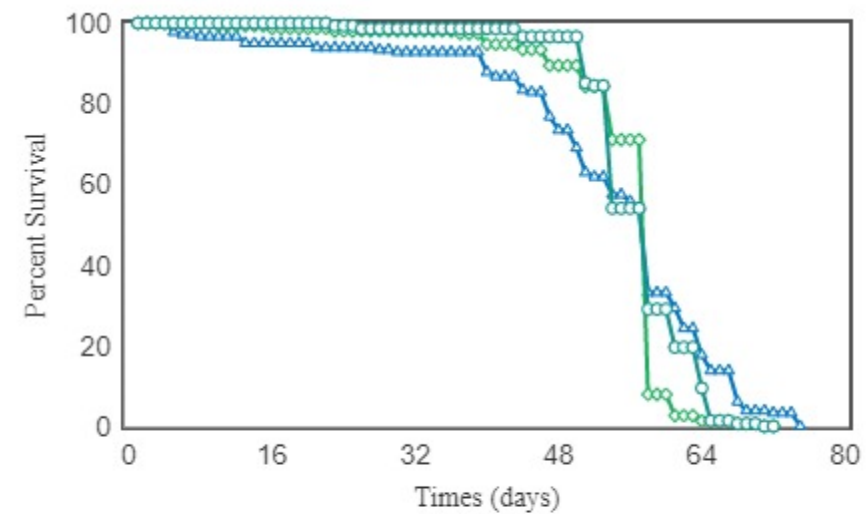

**c**

WTnegativecontrolmale WTcontrol  
WT1mcrmol WT5mcrmol  
WT10mcrmol WT50mcrmol

**d**

WTnegativecontrolmale WTcontrol  
WT1mcrmol WT5mcrmol  
WT10mcrmol WT50mcrmol

\*-  $p = 0.000012$ , according to Log-Rank Test with Bonferroni correction (comparison with DMSO control)

**Supplementary figure S2 KL001-treated females' survival**

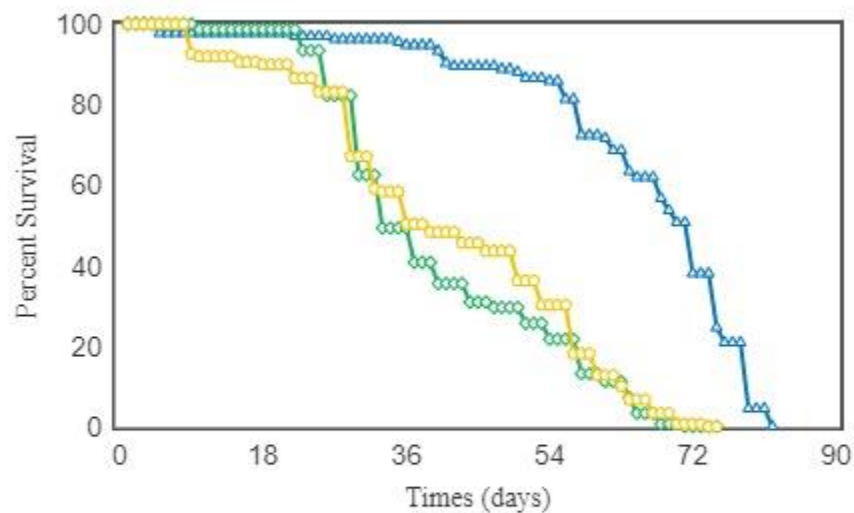

a

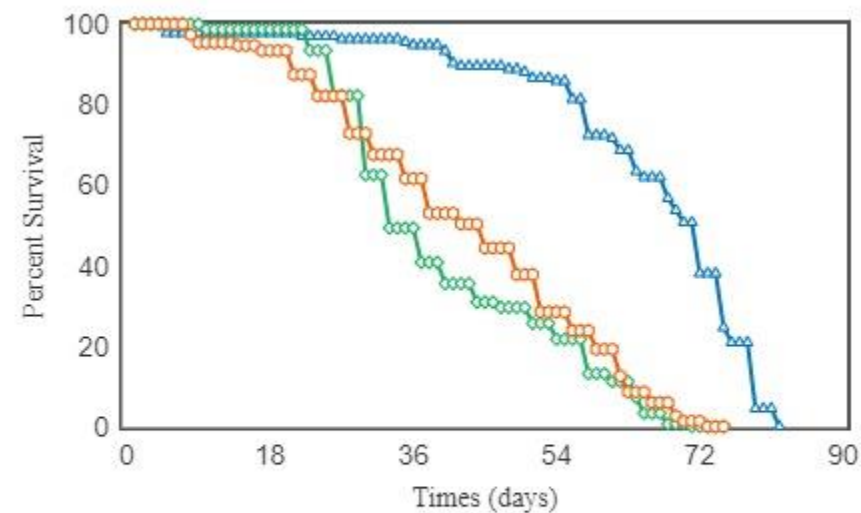

b

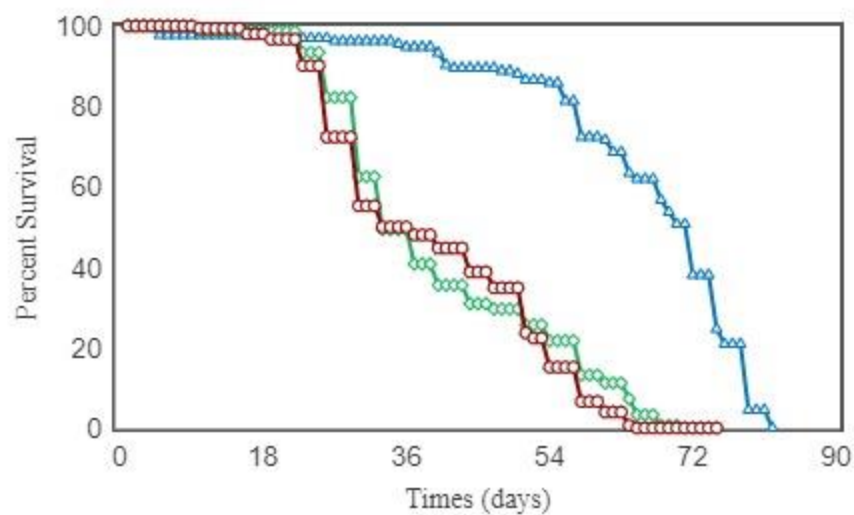

c

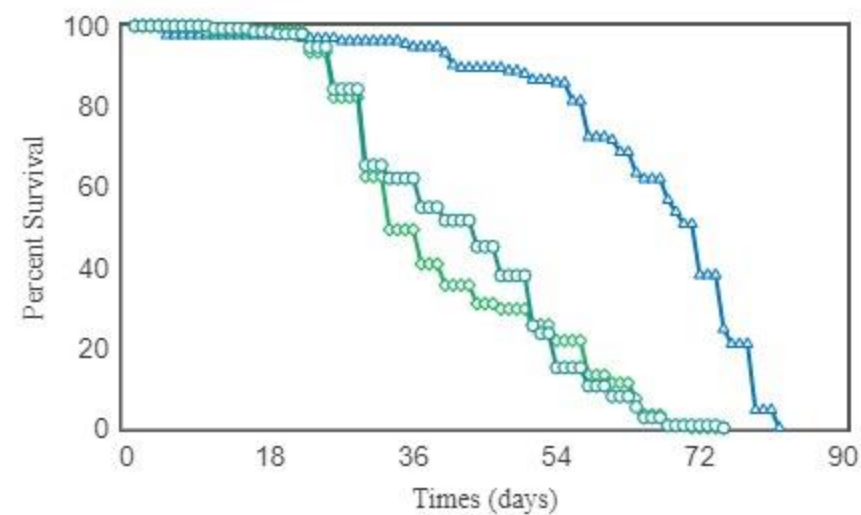

d

**Supplementary figure S3 KS15-treated males' survival**

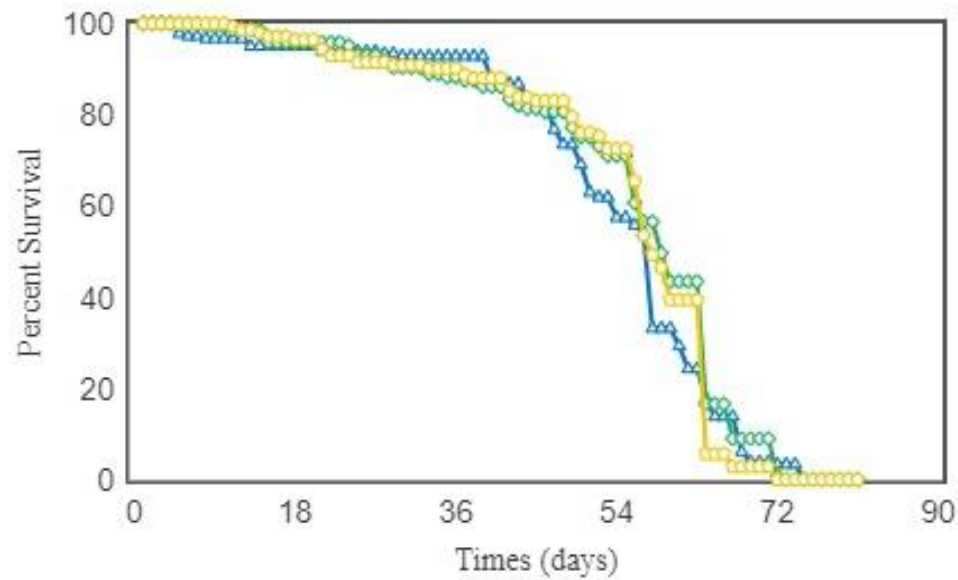

a

WTnegativecontrolmale  
WT1mcrmol  
WT10mcrmol

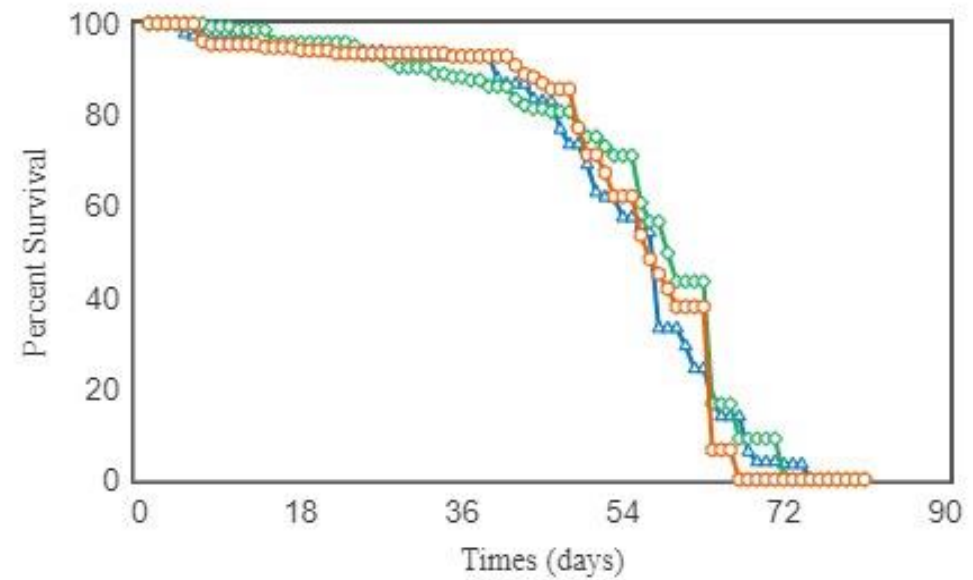

b

WTnegativecontrolmale  
WTcontrol  
WT5mcrmol

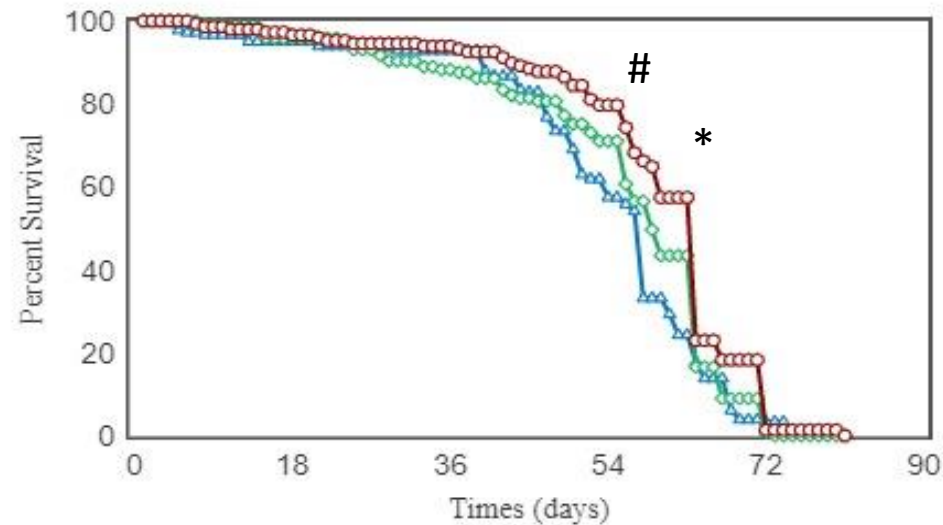

WTnegativecontrolmale  
WT1mcrmol  
WT5mcrmol  
WT10mcrmol

\* -  $p = 0.0166$ , according to Log-Rank Test with Bonferroni correction (comparison with DMSO control)

# -  $p = 0.0000094$ , according to Log-Rank Test with Bonferroni correction (comparison with negative control)

**Supplementary figure S4 KS15-treated females' survival**

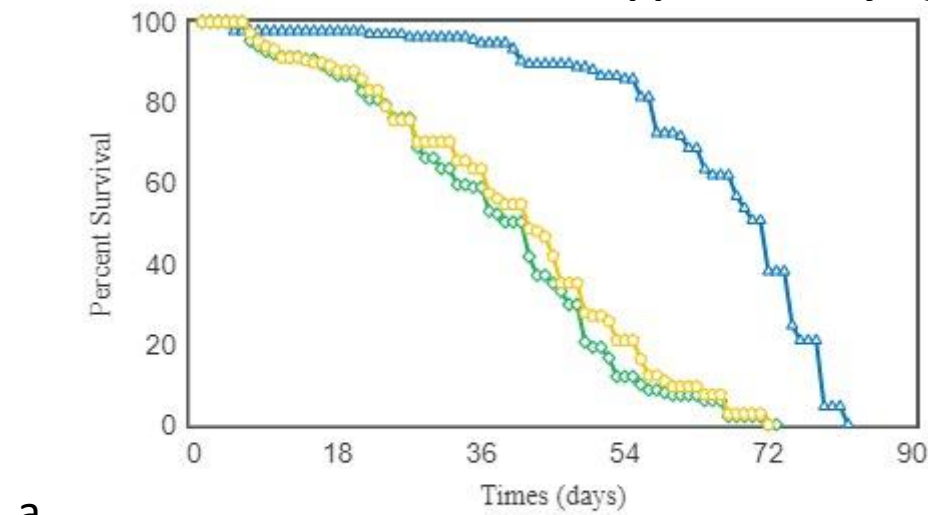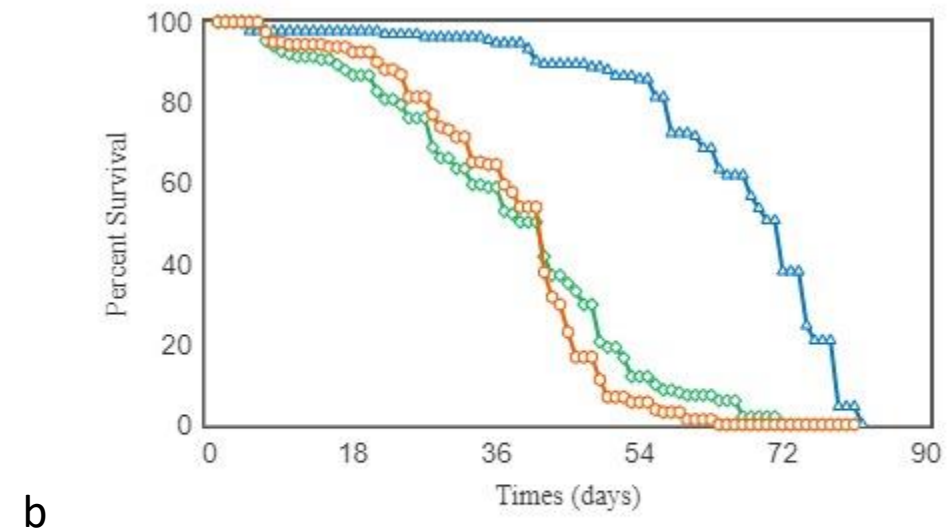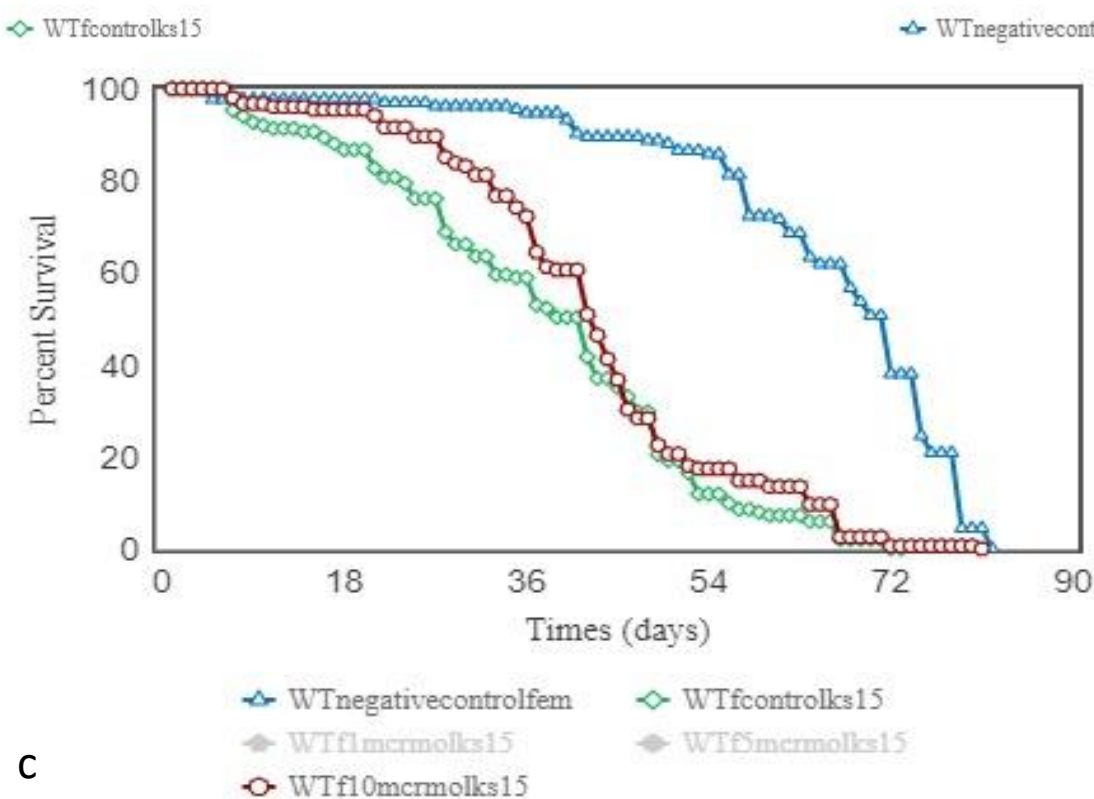

Supplement: s1 [file s1]
